# Supplementary material for: Co-Existence of Certain ESBLs, MBLs and Plasmid Mediated Quinolone Resistance Genes among MDR E. coli Isolated from Different Clinical Specimens in Egypt
Source: MDPI journal article supplement (doi:10.3390/antibiotics10070835), 2021-07-09
Supplement: s1 [file s1]

**Table S1.** The different tested antibiotics and their different biological processes targets.

| <b>Name of Antibiotic</b>     | <b>The Targeted Biological Process</b> |
|-------------------------------|----------------------------------------|
| Amoxycillin/clavulanic        | Cell wall                              |
| Cephalothin                   | Cell wall                              |
| Cefadroxil                    | Cell wall                              |
| Cefotaxime                    | Cell wall                              |
| Ampicillin /sulbactam         | Cell wall                              |
| Cefepime                      | Cell wall                              |
| Ceftazidime                   | Cell wall                              |
| Cefpodoxime                   | Cell wall                              |
| Sulfamethoxazole/trimethoprim | Replication                            |
| Doxycycline                   | Translation                            |
| Ceftriaxone                   | Cell wall                              |
| Aztreonam                     | Cell wall                              |
| Nalidixic acid                | Transcription                          |
| Cefoperazone                  | Cell wall                              |
| Streptomycin                  | Translation                            |
| Tobramycin                    | Translation                            |
| Ofloxacin                     | Transcription and Replication          |
| Gentamycin                    | Translation                            |
| Norfloxacin                   | Transcription and Replication          |
| Ciprofloxacin                 | Transcription and Replication          |
| Meropenem                     | Cell wall                              |
| Piperacillin /tazobactam      | Cell wall                              |
| Chloramphenicol               | Translation                            |
| Levofloxacin                  | Transcription and Replication          |
| Amikacin                      | Translation and                        |
| Azithromycin                  | Translation                            |
| Imipenem                      | Cell wall                              |

**Table S2.** The different thresholds of inhibition zones according to CLSI (2018).

| <b>Antibiotics</b>            | <b>Abbreviation</b> | <b>Disk Potency</b> | <b>Diameter Zone (mm)</b> |          |          |
|-------------------------------|---------------------|---------------------|---------------------------|----------|----------|
|                               |                     |                     | <b>R</b>                  | <b>I</b> | <b>S</b> |
| <b>Amoxycillin/clavulanic</b> | <b>AMC</b>          | 20/10 µg            | ≤13                       | 14-17    | ≥18      |
| Cephalothin                   | KF                  | 30 µg               | ≤17                       | 18-20    | ≥21      |
| Cefadroxil                    | CFR                 | 30 µg               | ≤17                       | 18-20    | ≥21      |
| Cefotaxime                    | CTX                 | 30 µg               | ≤22                       | 23-25    | ≥26      |
| Ampicillin /sulbactam         | SAM                 | 10/10 µg            | ≤11                       | 12-14    | ≥15      |
| Cefepime                      | FEP                 | 30 µg               | ≤18                       | -        | ≥25      |
| Ceftazidime                   | CAZ                 | 30 µg               | ≤17                       | 18-20    | ≥21      |
| Cefpodoxime                   | CPD                 | 10 µg               | ≤21                       | 18-20    | ≥17      |
| Sulfamethoxazole/trimethoprim | SXT                 | 1.25/23.75 µg       | ≤16                       | 11-15    | ≥16      |
| Doxycycline                   | DO                  | 30 µg               | ≤10                       | 11-13    | ≥14      |
| Ceftriaxone                   | CRO                 | 30 µg               | ≤19                       | 20-22    | ≥23      |

| Antibiotics              | Abbreviation | Disk Potency | Diameter Zone (mm) |       |     |
|--------------------------|--------------|--------------|--------------------|-------|-----|
|                          |              |              | R                  | I     | S   |
| Aztreonam                | ATM          | 30 µg        | ≤17                | 18-20 | ≥21 |
| Nalidixic acid           | NA           | 30 µg        | ≤13                | 14-18 | ≥19 |
| Cefoperazone             | CEP          | 75µg         | ≤15                | 16-20 | ≥21 |
| Streptomycin             | S            | 10 µg        | ≤11                | 12-14 | ≥15 |
| Tobramycin               | TOB          | 10 µg        | ≤12                | 13-14 | ≥15 |
| Ofloxacin                | OFX          | 5 µg         | ≤12                | 13-15 | ≥16 |
| Gentamycin               | CN           | 10 µg        | ≤12                | 13-14 | ≥15 |
| Norfloxacin              | NOR          | 10 µg        | ≤12                | 13-16 | ≥17 |
| Ciprofloxacin            | CIP          | 5 µg         | ≤15                | 16-20 | ≥21 |
| Meropenem                | MEM          | 10 µg        | ≤19                | 20-22 | ≥23 |
| Piperacillin /tazobactam | TZP          | 100/10µg     | ≤17                | 18-20 | ≥21 |
| Chloramphenicol          | C            | 30           | ≤12                | 13-17 | ≥18 |
| Levofloxacin             | LEV          | 5 µg         | ≤13                | 14-16 | ≥17 |
| Amikacin                 | AK           | 30 µg        | ≤14                | 15-16 | ≥17 |
| Azithromycin             | AZ           | 15 µg        | ≤12                | -     | ≥13 |
| Nitrofurantoin           | F            | 300 µg       | ≤14                | 15-16 | ≥14 |
| Imipenem                 | IMP          | 10 µg        | ≤19                | 20-22 | ≥23 |

**Table S3.** Different serotypes of the intestinal E. coli.

| Sample name | O    | H   |
|-------------|------|-----|
| 6R S        | O115 | H20 |
| 55S         | O115 | H7  |
| 5S          | O115 | H4  |
| 3S          | O151 | H2  |
| 9S          | O158 | H2  |
| 145S        | O158 | H2  |
| 178S        | O158 | H4  |
| 183S        | O55  | H5  |
| 183*S       | O126 | H5  |
| 81S         | O86a | H2  |
| 135S        | O125 | H2  |
| 211S        | O159 | H5  |
| 130S        | O157 | H7  |
| 3'S         | O157 | H7  |
| 9'S         | O157 | H7  |

**Table S4.** Resistance pattern of ESBLs and MBLs producers.

| Antibiotic             | Resistance % *              |                            |
|------------------------|-----------------------------|----------------------------|
|                        | ESBLs Producers<br>(n = 85) | MBLs Producers<br>(n = 48) |
| Amoxycillin/Clavulanic | 99                          | 100                        |
| Cefadroxil             | 95                          | 97.9                       |

|                               |    |       |
|-------------------------------|----|-------|
| Cephalothin                   | 95 | 100   |
| Cefotaxime                    | 91 | 97.9  |
| Ampicillin /sulbactam         | 90 | 91.6  |
| Ceftazidime                   | 85 | 93.75 |
| Cefpodoxime                   | 85 | 95.8  |
| Doxycycline                   | 82 | 81    |
| Cefepime                      | 80 | 81    |
| Sulfamethoxazole/trimethoprim | 80 | 85.4  |
| Aztreonam                     | 77 | 83.3  |
| Cefoperazone                  | 76 | 85.5  |
| Ceftriaxone                   | 74 | 85.4  |
| Meropenem                     | 69 | 93.75 |
| Nalidixic acid                | 64 | 75    |
| Streptomycin                  | 64 | 62.5  |
| Tobramycin                    | 45 | 56    |
| Gentamycin                    | 44 | 39.5  |
| Ofloxacin                     | 44 | 54    |
| Piperacillin /tazobactam      | 41 | 54    |
| Imipenem                      | 40 | 52    |
| Ciprofloxacin                 | 39 | 50    |
| Amikacin                      | 36 | 39.5  |
| Levofloxacin                  | 32 | 41.6  |
| Chloramphenicol               | 29 | 29    |
| Azithromycin                  | 29 | 29    |

\*percents were correlated to the number of ESBLs or MBLs producers.

**Table S5.** Correlation coefficient of the number of detected genes in isolates with the resistance of the antibiotics.

| Antibiotic                    | Person Correlation Coefficient with Number of Detected Genes |
|-------------------------------|--------------------------------------------------------------|
| Amoxycillin/clavulanic        | 0.189                                                        |
| Cefadroxil                    | 0.283**                                                      |
| Cephalothin                   | 0.384**                                                      |
| Cefotaxime                    | 0.445**                                                      |
| Ampicillin /sulbactam         | 0.327                                                        |
| Ceftazidime                   | 0.481**                                                      |
| Cefpodoxime                   | 0.621**                                                      |
| Doxycycline                   | 0.116                                                        |
| Cefepime                      | 0.150                                                        |
| Sulfamethoxazole/trimethoprim | 0.210*                                                       |
| Aztreonam                     | 0.211*                                                       |
| Cefoperazone                  | 0.415**                                                      |
| Ceftriaxone                   | 0.424**                                                      |

|                          |         |
|--------------------------|---------|
| Nalidixic acid           | 0.193   |
| Streptomycin             | 0.104   |
| Tobramycin               | 0.180   |
| Gentamycin               | 0.135   |
| Ofloxacin                | 0.061   |
| Piperacillin /tazobactam | 0.385** |
| Imipenem                 | 0.353** |
| Meropenem                | 0.323** |
| Ciprofloxacin            | 0.276** |
| Norfloxacin              | 0.288** |
| Amikacin                 | 0.306** |
| Levofloxacin             | 0.152   |
| Chloramphenicol          | 0.035   |
| Azithromycin             | 0.046   |
| MAR indexes              | 0.557** |

*p* values were calculated by Fisher's exact test. \* *p* value is significant at 0.05 level (2-tailed), \*\*\**p* value is significant at 0.01 level (2-tailed).

**Table S6.** Primers used in the current study.

| Gene          | Sequence                                                         | Product size | Annealing | Reference |
|---------------|------------------------------------------------------------------|--------------|-----------|-----------|
| bla-NDM       | F 5'-GGTTTGGCGATCTGGTTTTTC-3'<br>R 5'-CGGAATGGCTCATCACGATC-3'    | 621 bp       | 55        | [63]      |
| bla-CTX-M     | F 5'-TCTTCCAGAATAAGGAATCCC-3'<br>R 5'-CCGTTTCCGCTATTACAAAC-3'    | 909 bp       | 58        | [64]      |
| bla-SHV       | F 5'-TACCATGAGCGATAACAGCG3'<br>R 5'-GATTTGCTGATTTCGCTCGG-3'      | 450 bp       | 58        | [65]      |
| bla-TEM       | F 5'-TCCGCTCATGAGACAATAACC3'<br>R 5'-ATAATACCGCACCACATAGCAG3'    | 296 bp       | 58        | [66]      |
| bla-IMP       | F 5'-GGAATAGAGTGGCTTAATTCTC3'<br>R 5'-CCAAACCACTACGTTATCT-3'     | 188 bp       | 56        | [67]      |
| bla-KPC       | F 5'- CAGCTCATTCAAGGGCTTTC -3'<br>R 5'- AGTCATTTGCCGTGCCATAC -3' | 533 bp       | 58        | [68]      |
| bla-Oxa-48    | F 5'-TTGGTGGCATCGATTATCGG-3'<br>R 5'-GAGCACTTCTTTTGTGATGGC-3'    | 743 bp       | 58        | [69]      |
| aac(6')-lb-cr | F 5'- TGACCTTGCGATGCTCTATG-3'<br>R 5'- TTAGGCATCACTGCGTGTTC -3'  | 505 bp       | 56        | [70]      |
